# Supplementary material for: Psychometric properties of the Indonesian version of social anxiety questionnaire for adults (SAQ-A30)
Source: Research Square preprint supplement (doi:10.21203/rs.3.rs-5564217/v1), 2025-05-06
Supplement: Supplementary file 1 [file 099f51ec86adc2c459d9c57d.docx]

Psychometric properties of the Indonesian version of social anxiety questionnaire for adults (SAQ-A30)

Gilda Thiefanee, Kustimah Kustimah, Nurul Wardhani

Supplementary Information:

Expert Judgment Scores

| Panelist | | P1 | | | P2 | | | P3 | | | P4 | | | P5 | | | Total V | Status | Total CVR | Status |
| --- | --- | --- | --- | --- | --- | --- | --- | --- | --- | --- | --- | --- | --- | --- | --- | --- | --- | --- | --- | --- |
| Factor | Item | CVR | | V | CVR | | V | CVR | | V | CVR | | V | CVR | | V |
| Speaking in public / talking with people in authority | 3 | P | 1 | 5 | P | 1 | 5 | P | 1 | 5 | P | 1 | 5 | P | 1 | 5 | 1 | Accepted | 1 | Accepted |
| 7 | P | 1 | 5 | P | 1 | 5 | P | 1 | 4 | P | 1 | 5 | P | 1 | 5 | 0.95 | Accepted | 1 | Accepted |
| 12 | P | 1 | 5 | P | 1 | 5 | P | 1 | 5 | P | 1 | 5 | P | 1 | 5 | 1 | Accepted | 1 | Accepted |
| 18 | P | 1 | 4 | P | 1 | 5 | P | 1 | 4 | P | 1 | 5 | P | 1 | 5 | 0.9 | Accepted | 1 | Accepted |
| 25 | P | 1 | 5 | P | 1 | 5 | P | 1 | 4 | P | 1 | 3 | P | 1 | 5 | 0.85 | Rejected | 1 | Accepted |
| 29 | P | 1 | 5 | P | 1 | 5 | P | 1 | 5 | P | 1 | 5 | P | 1 | 5 | 1 | Accepted | 1 | Accepted |
| Interactions with the opposite sex | 4 | P | 1 | 5 | P | 1 | 5 | P | 1 | 5 | P | 1 | 5 | P | 1 | 5 | 1 | Accepted | 1 | Accepted |
| 6 | P | 1 | 4 | P | 1 | 5 | P | 1 | 5 | P | 1 | 5 | P | 1 | 4 | 0.9 | Accepted | 1 | Accepted |
| 20 | P | 1 | 5 | P | 1 | 5 | P | 1 | 5 | P | 1 | 5 | P | 1 | 5 | 1 | Accepted | 1 | Accepted |
| 23 | P | 1 | 5 | P | 1 | 5 | P | 1 | 5 | P | 1 | 5 | P | 1 | 5 | 1 | Accepted | 1 | Accepted |
| 27 | P | 1 | 3 | P | 1 | 5 | P | 1 | 5 | TP | 0 | 2 | TP | 0 | 3 | 0.65 | Rejected | 0.2 | Rejected |
| 30 | P | 1 | 5 | P | 1 | 5 | P | 1 | 5 | P | 1 | 4 | P | 1 | 4 | 0.9 | Accepted | 1 | Accepted |
| Assertive expression of annoyance, disgust, or displeasure | 2 | P | 1 | 5 | P | 1 | 5 | P | 1 | 5 | P | 1 | 5 | P | 1 | 5 | 1 | Accepted | 1 | Accepted |
| 5 | P | 1 | 5 | P | 1 | 5 | P | 1 | 5 | P | 1 | 5 | P | 1 | 5 | 1 | Accepted | 1 | Accepted |
| 9 | P | 1 | 5 | P | 1 | 5 | P | 1 | 5 | P | 1 | 5 | P | 1 | 5 | 1 | Accepted | 1 | Accepted |
| 11 | P | 1 | 5 | P | 1 | 5 | P | 1 | 5 | P | 1 | 5 | P | 1 | 5 | 1 | Accepted | 1 | Accepted |
| 14 | P | 1 | 5 | P | 1 | 5 | P | 1 | 5 | P | 1 | 5 | P | 1 | 5 | 1 | Accepted | 1 | Accepted |
| 26 | P | 1 | 5 | P | 1 | 5 | P | 1 | 5 | P | 1 | 5 | P | 1 | 5 | 1 | Accepted | 1 | Accepted |
| Criticism and embarrassment | 1 | P | 1 | 5 | P | 1 | 5 | P | 1 | 5 | P | 1 | 4 | P | 1 | 5 | 0.95 | Accepted | 1 | Accepted |
| 8 | P | 1 | 5 | P | 1 | 5 | P | 1 | 5 | P | 1 | 4 | P | 1 | 5 | 0.95 | Accepted | 1 | Accepted |
| 16 | P | 1 | 5 | P | 1 | 5 | P | 1 | 5 | P | 1 | 5 | P | 1 | 5 | 1 | Accepted | 1 | Accepted |
| 21 | P | 1 | 5 | P | 1 | 5 | P | 1 | 5 | P | 1 | 5 | P | 1 | 5 | 1 | Accepted | 1 | Accepted |
| 24 | P | 1 | 5 | P | 1 | 5 | P | 1 | 5 | P | 1 | 5 | P | 1 | 5 | 1 | Accepted | 1 | Accepted |
| 28 | P | 1 | 5 | P | 1 | 5 | P | 1 | 5 | P | 1 | 5 | P | 1 | 5 | 1 | Accepted | 1 | Accepted |
| Interactions with strangers | 10 | P | 1 | 5 | P | 1 | 5 | P | 1 | 4 | P | 1 | 5 | P | 1 | 5 | 0.95 | Accepted | 1 | Accepted |
| 13 | P | 1 | 5 | P | 1 | 5 | P | 1 | 5 | P | 1 | 5 | P | 1 | 5 | 1 | Accepted | 1 | Accepted |
| 15 | P | 1 | 5 | P | 1 | 5 | P | 1 | 5 | P | 1 | 5 | P | 1 | 5 | 1 | Accepted | 1 | Accepted |
| 17 | P | 1 | 5 | P | 1 | 5 | P | 1 | 5 | P | 1 | 5 | P | 1 | 5 | 1 | Accepted | 1 | Accepted |
| 19 | P | 1 | 5 | P | 1 | 5 | P | 1 | 4 | P | 1 | 5 | P | 1 | 5 | 0.95 | Accepted | 1 | Accepted |
| 22 | P | 1 | 5 | P | 1 | 5 | P | 1 | 5 | P | 1 | 5 | P | 1 | 5 | 1 | Accepted | 1 | Accepted |
