# Supplementary material for: Psychometric properties of the Indonesian version of social anxiety questionnaire for adults (SAQ-A30)
Source: Research Square preprint supplement (doi:10.21203/rs.3.rs-5564217/v1), 2025-05-06
Supplement: Supplementary file 2 [file 46449a9b90da8c576a2b8ad9.docx]

Psychometric properties of the Indonesian version of social anxiety questionnaire for adults (SAQ-A30)

Gilda Thiefanee, Kustimah Kustimah, Nurul Wardhani

Supplementary Information:

Adaptation of LSAS-SR Into Indonesian

| **No.** | **LSAS-SR** | **LSAS-SR-Indonesia** |
| --- | --- | --- |
| 1 | Telephoning in public (performance) | Menelepon di tempat umum (performance) |
| 2 | Participating in small groups (performance) | Berpartisipasi dalam suatu kegiatan kelompok kecil (performance) |
| 3 | Eating in public places (performance) | Makan di tempat umum (performance) |
| 4 | Drinking with others in public places (performance) | Minum-minum bersama orang lain di tempat umum (performance) |
| 5 | Talking to people in authority (social interaction) | Berbicara dengan orang yang memiliki wewenang (social interaction) |
| 6 | Acting, performing or giving a talk in front of an audience (performance) | Berakting, pentas, atau berbicara di hadapan banyak ‘penonton’ (performance) |
| 7 | Going to a party (social interaction) | Pergi ke pesta (social interaction) |
| 8 | Working while being observed (performance) | Bekerja sambil diamati (performance) |
| 9 | Writing while being observed (performance) | Menulis sambil diamati (performance) |
| 10 | Calling someone you don’t know very well (social interaction) | Menelpon orang yang tidak terlalu Anda kenal (social interaction) |
| 11 | Talking with people you don’t know very well (social interaction) | Berbicara tatap muka dengan orang yang tidak terlalu Anda kenal (social interaction) |
| 12 | Meeting strangers (social interaction) | Bertemu dengan orang yang tidak terlalu Anda kenal (social interaction) |
| 13 | Urinating in a public bathroom (performance) | Buang air kecil di toilet umum (performance) |
| 14 | Entering a room when others are already seated (performance) | Memasuki ruangan ketika orang-orang sudah duduk di tempatnya (performance) |
| 15 | Being the centre of attention (social interaction) | Menjadi pusat perhatian (social interaction) |
| 16 | Speaking up at a meeting (performance) | Menyatakan pendapat dalam rapat (performance) |
| 17 | Taking a test (performance) | Menjalani tes mengenai kemampuan, keterampilan atau pengetahuan Anda (performance) |
| 18 | Expressing a disagreement or disapproval to people you don’t know very well (social interaction) | Mengungkapkan ketidaksepahaman atau celaan terhadap seseorang yang tidak begitu Anda kenal (social interaction) |
| 19 | Looking at people you don’t know very well in the eyes (social interaction) | Menatap mata seseorang yang tidak begitu Anda kenal (social interaction) |
| 20 | Giving a report to a group (performance) | Menyampaikan pidato yang sudah dipersiapkan kepada suatu kelompok (performance) |
| 21 | Trying to pick up someone (performance) | Mencoba berkenalan dengan seseorang dengan tujuan percintaan atau hubungan seksual (performance) |
| 22 | Returning goods to a store (social interaction) | Mengembalikan barang ke toko untuk mendapatkan pengembalian uang (social interaction) |
| 23 | Giving a party (social interaction) | Mengadakan pesta (social interaction) |
| 24 | Resisting a high pressure sales person (social interaction) | Menolak seorang penjual yang gigih (social interaction) |
