# Supplementary material for: Psychometric properties of the Indonesian version of social anxiety questionnaire for adults (SAQ-A30)
Source: Research Square preprint supplement (doi:10.21203/rs.3.rs-5564217/v1), 2025-05-06
Supplement: Supplementary file 3 [file 76b8b7d142b006e325e3fab4.docx]

Psychometric properties of the Indonesian version of social anxiety questionnaire for adults (SAQ-A30)

Gilda Thiefanee, Kustimah Kustimah, Nurul Wardhani

Supplementary Information:

Demographic characteristics of the study participants (*n* = 522)

| Category | Frequency | % |
| --- | --- | --- |
| Gender |  |  |
| Female | 255 | 48.851 |
| Male | 267 | 51.149 |
| Age Cohort |  |  |
| Early Adult | 299 | 57.28 |
| Middle Adult | 186 | 35.63 |
| Late Adult | 37 | 7.08 |
| Education |  |  |
| Nongraduate | 68 | 13.03 |
| Graduate | 366 | 70.11 |
| Postgraduate | 88 | 16.86 |
| Occupation | | |
| Student | 76 | 14.56 |
| Employed | 336 | 64.37 |
| Unemployed | 77 | 14.75 |
| Retired | 33 | 6.32 |
