# Supplementary material for: Psychometric properties of the Indonesian version of social anxiety questionnaire for adults (SAQ-A30)
Source: Research Square preprint supplement (doi:10.21203/rs.3.rs-5564217/v1), 2025-05-06
Supplement: Supplementary file 4 [file 83944e33b500e4705b3fc0b3.docx]

Psychometric properties of the Indonesian version of social anxiety questionnaire for adults (SAQ-A30)

Gilda Thiefanee, Kustimah Kustimah, Nurul Wardhani

Supplementary Information:

Adaptation of GAD-7 Into Indonesian as Seen in (29)

| **No.** | **GAD-7** | **GAD-7-Indonesia** |
| --- | --- | --- |
| 1 | Feeling nervous, anxious, or on edge | Merasa gugup, cemas, atau gelisah |
| 2 | Not being able to stop or control worrying | Tidak dapat berhenti khawatir |
| 3 | Worrying too much about different things | Terlalu mengkhawatirkan banyak hal |
| 4 | Trouble relaxing | Sulit untuk merasa santai |
| 5 | Being so restless that it is hard to sit still | Merasa sangat gelisah sehingga sulit untuk diam/tenang |
| 6 | Becoming easily annoyed or irritable | Mudah merasa terganggu atau tersinggung |
| 7 | Feeling afraid, as if something awful might happen | Merasa takut seakan sesuatu yang buruk akan terjadi |
