# Supplementary material for: Psychometric properties of the Indonesian version of social anxiety questionnaire for adults (SAQ-A30)
Source: Research Square preprint supplement (doi:10.21203/rs.3.rs-5564217/v1), 2025-05-06
Supplement: Supplementary file 5 [file 8af347ad27219e7bad296373.docx]

Psychometric properties of the Indonesian version of social anxiety questionnaire for adults (SAQ-A30)

Gilda Thiefanee, Kustimah Kustimah, Nurul Wardhani

Supplementary Information:

Qualifications of Translators, Peer Reviewers, and Expert Judgment Panelists

Table 1 Qualifications of Translators and Peer Reviewers

| **Role** | **Qualifications** |
| --- | --- |
| *Forward translator* 1 | - English to Indonesian translator for 6 years. - Bachelor of International Relations from Universitas Muhammadiyah Yogyakarta. - Bachelor of Public Relations and English Literature from Universitat Jaume I. - Registered in Association of Indonesian Translators. |
| *Forward translator* 2 | - English to Indonesian translator for 5 years. - English Language lecturer in Institut Ilmu Kesehatan Bhakti Wiyata Kediri for 6 years. - Master's in English Language Education from Universitas Negeri Malang. - Registered in Association of Indonesian Translators. |
| *Backward translation* 1 | - English to Indonesian translator for 3 years - English Language lecturer in Universitas Tadulako. - Master's in English Language Education from Universitas Sanata Dharma. |
| *Backward translation* 2 | - English to Indonesian translator, interpreter, and proof reader for 5 years. - Bachelor of English Literature from Universitas Kristen Petra. |
| *Peer reviewer* 1 | - Professional Master’s Degree student in Adult Clinical Psychology from Universitas Padjadjaran. - Counselor and psychometric assessment developer for 3 years. - Bachelor of Psychology from Universitas Indonesia. |
| *Peer reviewer* 2 | - Professional Master’s Degree student in Adult Clinical Psychology from Universitas Padjadjaran. - English Language teacher and assistant counselor for 2 years. - Bachelor of Psychology from Universitas Indonesia and University of Queensland. |
| *Peer reviewer* 3 | - Professional Master’s Degree student in Adult Clinical Psychology from Universitas Padjadjaran. - Neurology assistant for 5 years. |
| *Peer reviewer* 4 | - Professional Master’s Degree student in Adult Clinical Psychology from Universitas Padjadjaran. - *Trainer* and psychometric assessment administrator for 2 years. |

Table 2 Qualifications of Expert Judgment Panelists

| **Peran** | **Latar Belakang** |
| --- | --- |
| Panelist 1 | - Adult Clinical Psychologist for 4 years and Psychology lecturer in Universitas Padjadjaran for 3 years. - Professional Master’s Degree in Adult Clinical Psychology from Universitas Padjadjaran. - Registered in Indonesian Clinical Psychology Association. |
| Panelist 2 | - Adult Clinical Psychologist and Psychology lecturer in Universitas Padjadjaran for 34 years. - Master’s Degree in Psychology from Universitas Indonesia. - Registered in Indonesian Clinical Psychology Association. |
| Panelist 3 | - Adult Clinical Psychologist for 4 years and Psychology lecturer in Universitas Padjadjaran for 3 years. - Professional Master’s Degree in Adult Clinical Psychology from Universitas Padjadjaran. - Registered in Indonesian Clinical Psychology Association. |
| Panelist 4 | - Adult Clinical Psychologist and Psychology lecturer in Universitas Padjadjaran for 19 years. - Doctorate of Social Psychology from Radboud University. - Registered in Indonesian Clinical Psychology Association. |
| Panelist 5 | - Adult Clinical Psychologist and Psychology lecturer in Universitas Padjadjaran for 17 years. - Doctorate of Medical Psychology from Vrije Universiteit. - Registered in Indonesian Clinical Psychology Association. |
