# Supplementary material for: Psychometric properties of the Indonesian version of social anxiety questionnaire for adults (SAQ-A30)
Source: Research Square preprint supplement (doi:10.21203/rs.3.rs-5564217/v1), 2025-05-06
Supplement: Supplementary file 6 [file 8e370df2934c2df9ae857879.docx]

Psychometric properties of the Indonesian version of social anxiety questionnaire for adults (SAQ-A30)

Gilda Thiefanee, Kustimah Kustimah, Nurul Wardhani

Supplementary Information:

Fit Indices

| Category | Index | Cut-Off | Output |
| --- | --- | --- | --- |
| Absolute Fit | GFI | ≥ 0.90 – 0.95 | 0.981 |
| RMSEA | 0.05 – 0.08 | 0.070 |
| SRMR | ≤ 0.08 | 0.060 |
| Incremental Fit | CFI | ≥ 0.90 | 0.922 |
| TLI | ≥ 0.90 | 0.914 |
| NFI | ≥ 0.80 | 0.895 |
| IFI | ≥ 0.90 | 0.923 |
| Parsimonious Fit | PNFI | ≥ 0.50 | 0.873 |
