# Supplementary material for: Psychometric properties of the Indonesian version of social anxiety questionnaire for adults (SAQ-A30)
Source: Research Square preprint supplement (doi:10.21203/rs.3.rs-5564217/v1), 2025-05-06
Supplement: Supplementary file 7 [file 988a6a1a26a8984fc91b7417.docx]

Psychometric properties of the Indonesian version of social anxiety questionnaire for adults (SAQ-A30)

Gilda Thiefanee, Kustimah Kustimah, Nurul Wardhani

Supplementary Information:

Internal Reliability of SAQ-A30

| SAQ-A30 | Coefficient α | Coefficient ω |
| --- | --- | --- |
| Fc1: speaking in public / talking with people in authority | 0.787 | 0.794 |
| Fc2: interactions with the opposite sex | 0.813 | 0.816 |
| Fc3: assertive expression of annoyance, disgust, or displeasure | 0.706 | 0.716 |
| Fc4: criticism and embarrassment | 0.850 | 0.853 |
| Fc5: interactions with strangers | 0.868 | 0.868 |
| Total | 0.916 | 0.917 |
