# Supplementary material for: Psychometric properties of the Indonesian version of social anxiety questionnaire for adults (SAQ-A30)
Source: Research Square preprint supplement (doi:10.21203/rs.3.rs-5564217/v1), 2025-05-06
Supplement: Supplementary file 9 [file 9e617cbbc18d04f2420a0d52.docx]

Psychometric properties of the Indonesian version of social anxiety questionnaire for adults (SAQ-A30)

Gilda Thiefanee, Kustimah Kustimah, Nurul Wardhani

Supplementary Information:

Psychometric Analysis Results

# Factorial Validity

### Model fit

| *Chi-square test* | | | | | | | |
| --- | --- | --- | --- | --- | --- | --- | --- |
| Model | | Χ² | | df | | p | |
| Baseline model |  | 11530.111 |  | 378 |  |  |  |
| Factor model |  | 1206.196 |  | 340 |  | < .001 |  |
|  | | | | | | | |
| Note.   You may consider changing the standard error method to 'robust'. The estimator is DWLS. The test statistic is scaled.shifted. | | | | | | | |

#### Additional fit measures

| *Fit indices* | | | |
| --- | --- | --- | --- |
| Index | | Value | |
| Comparative Fit Index (CFI) |  | 0.922 |  |
| Tucker-Lewis Index (TLI) |  | 0.914 |  |
| Bentler-Bonett Non-normed Fit Index (NNFI) |  | 0.914 |  |
| Bentler-Bonett Normed Fit Index (NFI) |  | 0.895 |  |
| Parsimony Normed Fit Index (PNFI) |  | 0.873 |  |
| Bollen's Relative Fit Index (RFI) |  | 0.884 |  |
| Bollen's Incremental Fit Index (IFI) |  | 0.923 |  |
| Relative Noncentrality Index (RNI) |  | 0.922 |  |
|  | | | |
| Note.  Except for the PNFI, the fit indices are scaled because of categorical variables in the data. | | | |

| *Information criteria*  Information criteria are only available with ML-type estimators | | | |
| --- | --- | --- | --- |
|  | | Value | |
| Log-likelihood |  |  |  |
| Number of free parameters |  | 150.000 |  |
| Akaike (AIC) |  |  |  |
| Bayesian (BIC) |  |  |  |
| Sample-size adjusted Bayesian (SSABIC) |  |  |  |
|  | | | |

| *Other fit measures* | | | |
| --- | --- | --- | --- |
| Metric | | Value | |
| Root mean square error of approximation (RMSEA) |  | 0.070 |  |
| RMSEA 90% CI lower bound |  | 0.066 |  |
| RMSEA 90% CI upper bound |  | 0.074 |  |
| RMSEA p-value |  | 7.305×10-14 |  |
| Standardized root mean square residual (SRMR) |  | 0.060 |  |
| Hoelter's critical N (α = .05) |  | 187.228 |  |
| Hoelter's critical N (α = .01) |  | 196.728 |  |
| Goodness of fit index (GFI) |  | 0.981 |  |
| McDonald fit index (MFI) |  | 0.494 |  |
| Expected cross validation index (ECVI) |  |  |  |
|  | | | |
| Note.  The RMSEA results are scaled because of categorical variables in the data. | | | |

| *Kaiser-Meyer-Olkin (KMO) test* | | | |
| --- | --- | --- | --- |
| Indicator | | MSA | |
| SAQ3 |  | 0.824 |  |
| SAQ7 |  | 0.822 |  |
| SAQ12 |  | 0.833 |  |
| SAQ18 |  | 0.824 |  |
| SAQ27 |  | 0.758 |  |
| SAQ4 |  | 0.886 |  |
| SAQ6 |  | 0.938 |  |
| SAQ20 |  | 0.887 |  |
| SAQ23 |  | 0.921 |  |
| SAQ28 |  | 0.847 |  |
| SAQ2 |  | 0.888 |  |
| SAQ5 |  | 0.922 |  |
| SAQ9 |  | 0.895 |  |
| SAQ11 |  | 0.907 |  |
| SAQ14 |  | 0.796 |  |
| SAQ25 |  | 0.919 |  |
| SAQ1 |  | 0.939 |  |
| SAQ8 |  | 0.921 |  |
| SAQ16 |  | 0.889 |  |
| SAQ21 |  | 0.895 |  |
| SAQ24 |  | 0.919 |  |
| SAQ26 |  | 0.881 |  |
| SAQ13 |  | 0.941 |  |
| SAQ10 |  | 0.919 |  |
| SAQ15 |  | 0.924 |  |
| SAQ17 |  | 0.927 |  |
| SAQ19 |  | 0.915 |  |
| SAQ22 |  | 0.913 |  |
| Overall |  | 0.898 |  |
|  | | | |

| *Bartlett's test of sphericity* | | | | | |
| --- | --- | --- | --- | --- | --- |
| Χ² | | df | | p | |
| 7276.784 |  | 378 |  | < .001 |  |
|  | | | | | |

### Parameter estimates

| *Factor loadings* | | | | | | | | | | | | | | | |
| --- | --- | --- | --- | --- | --- | --- | --- | --- | --- | --- | --- | --- | --- | --- | --- |
|  | | | | | | | | | | | | 95% Confidence Interval | | | |
| Factor | | Indicator | | Estimate | | Std. Error | | z-value | | p | | Lower | | Upper | |
| Factor 1 |  | SAQ3 |  | 0.542 |  | 0.019 |  | 29.016 |  | < .001 |  | 0.505 |  | 0.578 |  |
|  |  | SAQ7 |  | 0.673 |  | 0.020 |  | 33.984 |  | < .001 |  | 0.634 |  | 0.712 |  |
|  |  | SAQ12 |  | 0.657 |  | 0.019 |  | 33.911 |  | < .001 |  | 0.619 |  | 0.695 |  |
|  |  | SAQ18 |  | 0.733 |  | 0.020 |  | 37.050 |  | < .001 |  | 0.694 |  | 0.772 |  |
|  |  | SAQ27 |  | 0.602 |  | 0.018 |  | 33.983 |  | < .001 |  | 0.568 |  | 0.637 |  |
| Factor 2 |  | SAQ4 |  | 0.616 |  | 0.015 |  | 41.546 |  | < .001 |  | 0.587 |  | 0.645 |  |
|  |  | SAQ6 |  | 0.736 |  | 0.015 |  | 48.091 |  | < .001 |  | 0.706 |  | 0.766 |  |
|  |  | SAQ20 |  | 0.781 |  | 0.014 |  | 56.956 |  | < .001 |  | 0.754 |  | 0.808 |  |
|  |  | SAQ23 |  | 0.826 |  | 0.014 |  | 59.331 |  | < .001 |  | 0.799 |  | 0.853 |  |
|  |  | SAQ28 |  | 0.669 |  | 0.014 |  | 47.233 |  | < .001 |  | 0.641 |  | 0.696 |  |
| Factor 3 |  | SAQ2 |  | 0.508 |  | 0.016 |  | 32.078 |  | < .001 |  | 0.477 |  | 0.539 |  |
|  |  | SAQ5 |  | 0.677 |  | 0.016 |  | 42.247 |  | < .001 |  | 0.646 |  | 0.709 |  |
|  |  | SAQ9 |  | 0.723 |  | 0.016 |  | 45.082 |  | < .001 |  | 0.691 |  | 0.754 |  |
|  |  | SAQ11 |  | 0.624 |  | 0.016 |  | 39.354 |  | < .001 |  | 0.593 |  | 0.655 |  |
|  |  | SAQ14 |  | 0.330 |  | 0.016 |  | 20.087 |  | < .001 |  | 0.298 |  | 0.362 |  |
|  |  | SAQ25 |  | 0.682 |  | 0.016 |  | 42.941 |  | < .001 |  | 0.651 |  | 0.713 |  |
| Factor 4 |  | SAQ1 |  | 0.791 |  | 0.015 |  | 51.532 |  | < .001 |  | 0.761 |  | 0.822 |  |
|  |  | SAQ8 |  | 0.705 |  | 0.015 |  | 47.394 |  | < .001 |  | 0.676 |  | 0.734 |  |
|  |  | SAQ16 |  | 0.693 |  | 0.015 |  | 46.660 |  | < .001 |  | 0.664 |  | 0.722 |  |
|  |  | SAQ21 |  | 0.729 |  | 0.014 |  | 50.338 |  | < .001 |  | 0.700 |  | 0.757 |  |
|  |  | SAQ24 |  | 0.762 |  | 0.015 |  | 52.091 |  | < .001 |  | 0.733 |  | 0.791 |  |
|  |  | SAQ26 |  | 0.769 |  | 0.014 |  | 54.400 |  | < .001 |  | 0.741 |  | 0.797 |  |
| Factor 5 |  | SAQ13 |  | 0.812 |  | 0.013 |  | 61.906 |  | < .001 |  | 0.786 |  | 0.838 |  |
|  |  | SAQ10 |  | 0.708 |  | 0.014 |  | 50.950 |  | < .001 |  | 0.681 |  | 0.736 |  |
|  |  | SAQ15 |  | 0.757 |  | 0.013 |  | 59.860 |  | < .001 |  | 0.733 |  | 0.782 |  |
|  |  | SAQ17 |  | 0.826 |  | 0.013 |  | 65.766 |  | < .001 |  | 0.801 |  | 0.850 |  |
|  |  | SAQ19 |  | 0.755 |  | 0.013 |  | 59.172 |  | < .001 |  | 0.730 |  | 0.780 |  |
|  |  | SAQ22 |  | 0.723 |  | 0.013 |  | 56.006 |  | < .001 |  | 0.697 |  | 0.748 |  |
|  | | | | | | | | | | | | | | | |

| *Factor variances* | | | | | | | | | | | | | |
| --- | --- | --- | --- | --- | --- | --- | --- | --- | --- | --- | --- | --- | --- |
|  | | | | | | | | | | 95% Confidence Interval | | | |
| Factor | | Estimate | | Std. Error | | z-value | | p | | Lower | | Upper | |
| Factor 1 |  | 1.000 |  | 0.000 |  |  |  |  |  | 1.000 |  | 1.000 |  |
| Factor 2 |  | 1.000 |  | 0.000 |  |  |  |  |  | 1.000 |  | 1.000 |  |
| Factor 3 |  | 1.000 |  | 0.000 |  |  |  |  |  | 1.000 |  | 1.000 |  |
| Factor 4 |  | 1.000 |  | 0.000 |  |  |  |  |  | 1.000 |  | 1.000 |  |
| Factor 5 |  | 1.000 |  | 0.000 |  |  |  |  |  | 1.000 |  | 1.000 |  |
|  | | | | | | | | | | | | | |

| *Factor Covariances* | | | | | | | | | | | | | | | | | |
| --- | --- | --- | --- | --- | --- | --- | --- | --- | --- | --- | --- | --- | --- | --- | --- | --- | --- |
|  | | | | | | | | | | | | | | 95% Confidence Interval | | | |
|  | |  | |  | | Estimate | | Std. Error | | z-value | | p | | Lower | | Upper | |
| Factor 1 |  | ↔ |  | Factor 2 |  | 0.434 |  | 0.020 |  | 22.184 |  | < .001 |  | 0.396 |  | 0.472 |  |
| Factor 1 |  | ↔ |  | Factor 3 |  | 0.516 |  | 0.021 |  | 24.049 |  | < .001 |  | 0.474 |  | 0.558 |  |
| Factor 1 |  | ↔ |  | Factor 4 |  | 0.450 |  | 0.017 |  | 25.802 |  | < .001 |  | 0.415 |  | 0.484 |  |
| Factor 1 |  | ↔ |  | Factor 5 |  | 0.403 |  | 0.017 |  | 24.285 |  | < .001 |  | 0.370 |  | 0.435 |  |
| Factor 2 |  | ↔ |  | Factor 3 |  | 0.672 |  | 0.019 |  | 36.183 |  | < .001 |  | 0.636 |  | 0.708 |  |
| Factor 2 |  | ↔ |  | Factor 4 |  | 0.541 |  | 0.014 |  | 38.477 |  | < .001 |  | 0.514 |  | 0.569 |  |
| Factor 2 |  | ↔ |  | Factor 5 |  | 0.659 |  | 0.013 |  | 49.319 |  | < .001 |  | 0.633 |  | 0.685 |  |
| Factor 3 |  | ↔ |  | Factor 4 |  | 0.609 |  | 0.017 |  | 35.965 |  | < .001 |  | 0.575 |  | 0.642 |  |
| Factor 3 |  | ↔ |  | Factor 5 |  | 0.621 |  | 0.016 |  | 38.825 |  | < .001 |  | 0.589 |  | 0.652 |  |
| Factor 4 |  | ↔ |  | Factor 5 |  | 0.564 |  | 0.012 |  | 45.278 |  | < .001 |  | 0.540 |  | 0.588 |  |
|  | | | | | | | | | | | | | | | | | |

| *Residual variances* | | | | | | | | | | | | | |
| --- | --- | --- | --- | --- | --- | --- | --- | --- | --- | --- | --- | --- | --- |
|  | | | | | | | | | | 95% Confidence Interval | | | |
| Indicator | | Estimate | | Std. Error | | z-value | | p | | Lower | | Upper | |
| SAQ3 |  | 0.707 |  | 0.000 |  |  |  |  |  | 0.707 |  | 0.707 |  |
| SAQ7 |  | 0.547 |  | 0.000 |  |  |  |  |  | 0.547 |  | 0.547 |  |
| SAQ12 |  | 0.568 |  | 0.000 |  |  |  |  |  | 0.568 |  | 0.568 |  |
| SAQ18 |  | 0.462 |  | 0.000 |  |  |  |  |  | 0.462 |  | 0.462 |  |
| SAQ27 |  | 0.637 |  | 0.000 |  |  |  |  |  | 0.637 |  | 0.637 |  |
| SAQ4 |  | 0.621 |  | 0.000 |  |  |  |  |  | 0.621 |  | 0.621 |  |
| SAQ6 |  | 0.459 |  | 0.000 |  |  |  |  |  | 0.459 |  | 0.459 |  |
| SAQ20 |  | 0.390 |  | 0.000 |  |  |  |  |  | 0.390 |  | 0.390 |  |
| SAQ23 |  | 0.318 |  | 0.000 |  |  |  |  |  | 0.318 |  | 0.318 |  |
| SAQ28 |  | 0.553 |  | 0.000 |  |  |  |  |  | 0.553 |  | 0.553 |  |
| SAQ2 |  | 0.742 |  | 0.000 |  |  |  |  |  | 0.742 |  | 0.742 |  |
| SAQ5 |  | 0.541 |  | 0.000 |  |  |  |  |  | 0.541 |  | 0.541 |  |
| SAQ9 |  | 0.478 |  | 0.000 |  |  |  |  |  | 0.478 |  | 0.478 |  |
| SAQ11 |  | 0.611 |  | 0.000 |  |  |  |  |  | 0.611 |  | 0.611 |  |
| SAQ14 |  | 0.891 |  | 0.000 |  |  |  |  |  | 0.891 |  | 0.891 |  |
| SAQ25 |  | 0.534 |  | 0.000 |  |  |  |  |  | 0.534 |  | 0.534 |  |
| SAQ1 |  | 0.374 |  | 0.000 |  |  |  |  |  | 0.374 |  | 0.374 |  |
| SAQ8 |  | 0.503 |  | 0.000 |  |  |  |  |  | 0.503 |  | 0.503 |  |
| SAQ16 |  | 0.519 |  | 0.000 |  |  |  |  |  | 0.519 |  | 0.519 |  |
| SAQ21 |  | 0.469 |  | 0.000 |  |  |  |  |  | 0.469 |  | 0.469 |  |
| SAQ24 |  | 0.419 |  | 0.000 |  |  |  |  |  | 0.419 |  | 0.419 |  |
| SAQ26 |  | 0.409 |  | 0.000 |  |  |  |  |  | 0.409 |  | 0.409 |  |
| SAQ13 |  | 0.341 |  | 0.000 |  |  |  |  |  | 0.341 |  | 0.341 |  |
| SAQ10 |  | 0.498 |  | 0.000 |  |  |  |  |  | 0.498 |  | 0.498 |  |
| SAQ15 |  | 0.426 |  | 0.000 |  |  |  |  |  | 0.426 |  | 0.426 |  |
| SAQ17 |  | 0.318 |  | 0.000 |  |  |  |  |  | 0.318 |  | 0.318 |  |
| SAQ19 |  | 0.430 |  | 0.000 |  |  |  |  |  | 0.430 |  | 0.430 |  |
| SAQ22 |  | 0.478 |  | 0.000 |  |  |  |  |  | 0.478 |  | 0.478 |  |
|  | | | | | | | | | | | | | |

| *Thresholds* | | | | | | | | | | | | | | | |
| --- | --- | --- | --- | --- | --- | --- | --- | --- | --- | --- | --- | --- | --- | --- | --- |
|  | | | | | | | | | | | | 95% Confidence Interval | | | |
| Indicator | | Threshold | | Estimate | | Std. Error | | z-value | | p | | Lower | | Upper | |
| SAQ3 |  | t1 |  | -1.771 |  | 0.101 |  | -17.518 |  | 0.000 |  | -1.969 |  | -1.572 |  |
|  |  | t2 |  | -1.143 |  | 0.070 |  | -16.295 |  | 0.000 |  | -1.281 |  | -1.006 |  |
|  |  | t3 |  | 0.038 |  | 0.055 |  | 0.700 |  | 0.484 |  | -0.069 |  | 0.146 |  |
|  |  | t4 |  | 1.685 |  | 0.095 |  | 17.712 |  | 0.000 |  | 1.499 |  | 1.872 |  |
| SAQ7 |  | t1 |  | -1.576 |  | 0.089 |  | -17.804 |  | 0.000 |  | -1.750 |  | -1.403 |  |
|  |  | t2 |  | -0.886 |  | 0.064 |  | -13.954 |  | 0.000 |  | -1.011 |  | -0.762 |  |
|  |  | t3 |  | -0.101 |  | 0.055 |  | -1.836 |  | 0.066 |  | -0.209 |  | 0.007 |  |
|  |  | t4 |  | 1.306 |  | 0.076 |  | 17.224 |  | 0.000 |  | 1.157 |  | 1.455 |  |
| SAQ12 |  | t1 |  | -1.576 |  | 0.089 |  | -17.804 |  | 0.000 |  | -1.750 |  | -1.403 |  |
|  |  | t2 |  | -0.983 |  | 0.066 |  | -14.955 |  | 0.000 |  | -1.112 |  | -0.854 |  |
|  |  | t3 |  | -0.058 |  | 0.055 |  | -1.049 |  | 0.294 |  | -0.165 |  | 0.050 |  |
|  |  | t4 |  | 0.999 |  | 0.066 |  | 15.104 |  | 0.000 |  | 0.869 |  | 1.128 |  |
| SAQ18 |  | t1 |  | -1.666 |  | 0.094 |  | -17.741 |  | 0.000 |  | -1.850 |  | -1.482 |  |
|  |  | t2 |  | -0.960 |  | 0.065 |  | -14.728 |  | 0.000 |  | -1.088 |  | -0.832 |  |
|  |  | t3 |  | -0.343 |  | 0.056 |  | -6.110 |  | 9.986×10-10 |  | -0.453 |  | -0.233 |  |
|  |  | t4 |  | 0.851 |  | 0.063 |  | 13.557 |  | 0.000 |  | 0.728 |  | 0.974 |  |
| SAQ27 |  | t1 |  | -1.611 |  | 0.091 |  | -17.794 |  | 0.000 |  | -1.788 |  | -1.433 |  |
|  |  | t2 |  | -0.937 |  | 0.065 |  | -14.499 |  | 0.000 |  | -1.064 |  | -0.811 |  |
|  |  | t3 |  | 0.087 |  | 0.055 |  | 1.574 |  | 0.115 |  | -0.021 |  | 0.194 |  |
|  |  | t4 |  | 1.871 |  | 0.109 |  | 17.163 |  | 0.000 |  | 1.658 |  | 2.085 |  |
| SAQ4 |  | t1 |  | -1.593 |  | 0.089 |  | -17.802 |  | 0.000 |  | -1.769 |  | -1.418 |  |
|  |  | t2 |  | -0.811 |  | 0.062 |  | -13.075 |  | 0.000 |  | -0.932 |  | -0.689 |  |
|  |  | t3 |  | 0.287 |  | 0.056 |  | 5.153 |  | 2.566×10-7 |  | 0.178 |  | 0.396 |  |
|  |  | t4 |  | 1.201 |  | 0.072 |  | 16.672 |  | 0.000 |  | 1.060 |  | 1.342 |  |
| SAQ6 |  | t1 |  | -1.469 |  | 0.083 |  | -17.716 |  | 0.000 |  | -1.632 |  | -1.307 |  |
|  |  | t2 |  | -0.817 |  | 0.062 |  | -13.156 |  | 0.000 |  | -0.939 |  | -0.695 |  |
|  |  | t3 |  | 0.164 |  | 0.055 |  | 2.972 |  | 0.003 |  | 0.056 |  | 0.272 |  |
|  |  | t4 |  | 1.705 |  | 0.096 |  | 17.675 |  | 0.000 |  | 1.516 |  | 1.894 |  |
| SAQ20 |  | t1 |  | -1.560 |  | 0.088 |  | -17.802 |  | 0.000 |  | -1.732 |  | -1.388 |  |
|  |  | t2 |  | -0.804 |  | 0.062 |  | -12.993 |  | 0.000 |  | -0.925 |  | -0.683 |  |
|  |  | t3 |  | 0.188 |  | 0.055 |  | 3.409 |  | 6.525×10-4 |  | 0.080 |  | 0.297 |  |
|  |  | t4 |  | 1.107 |  | 0.069 |  | 16.029 |  | 0.000 |  | 0.972 |  | 1.243 |  |
| SAQ23 |  | t1 |  | -1.329 |  | 0.077 |  | -17.319 |  | 0.000 |  | -1.479 |  | -1.178 |  |
|  |  | t2 |  | -0.618 |  | 0.059 |  | -10.497 |  | 0.000 |  | -0.734 |  | -0.503 |  |
|  |  | t3 |  | 0.242 |  | 0.055 |  | 4.369 |  | 1.251×10-5 |  | 0.134 |  | 0.351 |  |
|  |  | t4 |  | 1.211 |  | 0.072 |  | 16.732 |  | 0.000 |  | 1.069 |  | 1.352 |  |
| SAQ28 |  | t1 |  | -1.593 |  | 0.089 |  | -17.802 |  | 0.000 |  | -1.769 |  | -1.418 |  |
|  |  | t2 |  | -0.630 |  | 0.059 |  | -10.667 |  | 0.000 |  | -0.746 |  | -0.514 |  |
|  |  | t3 |  | 0.312 |  | 0.056 |  | 5.588 |  | 2.297×10-8 |  | 0.203 |  | 0.422 |  |
|  |  | t4 |  | 1.153 |  | 0.070 |  | 16.360 |  | 0.000 |  | 1.015 |  | 1.291 |  |
| SAQ2 |  | t1 |  | -1.428 |  | 0.081 |  | -17.633 |  | 0.000 |  | -1.587 |  | -1.269 |  |
|  |  | t2 |  | -0.425 |  | 0.057 |  | -7.497 |  | 6.550×10-14 |  | -0.537 |  | -0.314 |  |
|  |  | t3 |  | 0.373 |  | 0.056 |  | 6.631 |  | 3.345×10-11 |  | 0.263 |  | 0.484 |  |
|  |  | t4 |  | 1.252 |  | 0.074 |  | 16.962 |  | 0.000 |  | 1.107 |  | 1.396 |  |
| SAQ5 |  | t1 |  | -1.064 |  | 0.068 |  | -15.683 |  | 0.000 |  | -1.197 |  | -0.931 |  |
|  |  | t2 |  | -0.420 |  | 0.057 |  | -7.410 |  | 1.261×10-13 |  | -0.531 |  | -0.309 |  |
|  |  | t3 |  | 0.410 |  | 0.057 |  | 7.237 |  | 4.583×10-13 |  | 0.299 |  | 0.521 |  |
|  |  | t4 |  | 1.628 |  | 0.092 |  | 17.782 |  | 0.000 |  | 1.449 |  | 1.808 |  |
| SAQ9 |  | t1 |  | -1.455 |  | 0.082 |  | -17.691 |  | 0.000 |  | -1.617 |  | -1.294 |  |
|  |  | t2 |  | -0.784 |  | 0.062 |  | -12.749 |  | 0.000 |  | -0.905 |  | -0.664 |  |
|  |  | t3 |  | 0.000 |  | 0.055 |  | 0.000 |  | 1.000 |  | -0.108 |  | 0.108 |  |
|  |  | t4 |  | 1.352 |  | 0.078 |  | 17.408 |  | 0.000 |  | 1.200 |  | 1.505 |  |
| SAQ11 |  | t1 |  | -1.647 |  | 0.093 |  | -17.765 |  | 0.000 |  | -1.828 |  | -1.465 |  |
|  |  | t2 |  | -0.791 |  | 0.062 |  | -12.831 |  | 0.000 |  | -0.911 |  | -0.670 |  |
|  |  | t3 |  | 0.024 |  | 0.055 |  | 0.437 |  | 0.662 |  | -0.084 |  | 0.132 |  |
|  |  | t4 |  | 1.352 |  | 0.078 |  | 17.408 |  | 0.000 |  | 1.200 |  | 1.505 |  |
| SAQ14 |  | t1 |  | -1.039 |  | 0.067 |  | -15.469 |  | 0.000 |  | -1.171 |  | -0.907 |  |
|  |  | t2 |  | -0.130 |  | 0.055 |  | -2.361 |  | 0.018 |  | -0.238 |  | -0.022 |  |
|  |  | t3 |  | 0.389 |  | 0.056 |  | 6.891 |  | 5.553×10-12 |  | 0.278 |  | 0.500 |  |
|  |  | t4 |  | 1.402 |  | 0.080 |  | 17.566 |  | 0.000 |  | 1.246 |  | 1.558 |  |
| SAQ25 |  | t1 |  | -1.455 |  | 0.082 |  | -17.691 |  | 0.000 |  | -1.617 |  | -1.294 |  |
|  |  | t2 |  | -0.584 |  | 0.058 |  | -9.988 |  | 0.000 |  | -0.698 |  | -0.469 |  |
|  |  | t3 |  | 0.111 |  | 0.055 |  | 2.011 |  | 0.044 |  | 0.003 |  | 0.219 |  |
|  |  | t4 |  | 1.241 |  | 0.073 |  | 16.906 |  | 0.000 |  | 1.097 |  | 1.385 |  |
| SAQ1 |  | t1 |  | -1.415 |  | 0.080 |  | -17.601 |  | 0.000 |  | -1.572 |  | -1.257 |  |
|  |  | t2 |  | -0.607 |  | 0.059 |  | -10.328 |  | 0.000 |  | -0.722 |  | -0.492 |  |
|  |  | t3 |  | 0.373 |  | 0.056 |  | 6.631 |  | 3.345×10-11 |  | 0.263 |  | 0.484 |  |
|  |  | t4 |  | 1.685 |  | 0.095 |  | 17.712 |  | 0.000 |  | 1.499 |  | 1.872 |  |
| SAQ8 |  | t1 |  | -1.415 |  | 0.080 |  | -17.601 |  | 0.000 |  | -1.572 |  | -1.257 |  |
|  |  | t2 |  | -0.567 |  | 0.058 |  | -9.732 |  | 0.000 |  | -0.681 |  | -0.453 |  |
|  |  | t3 |  | 0.506 |  | 0.058 |  | 8.790 |  | 0.000 |  | 0.393 |  | 0.619 |  |
|  |  | t4 |  | 1.560 |  | 0.088 |  | 17.802 |  | 0.000 |  | 1.388 |  | 1.732 |  |
| SAQ16 |  | t1 |  | -1.705 |  | 0.096 |  | -17.675 |  | 0.000 |  | -1.894 |  | -1.516 |  |
|  |  | t2 |  | -1.031 |  | 0.067 |  | -15.397 |  | 0.000 |  | -1.162 |  | -0.899 |  |
|  |  | t3 |  | -0.410 |  | 0.057 |  | -7.237 |  | 4.583×10-13 |  | -0.521 |  | -0.299 |  |
|  |  | t4 |  | 0.584 |  | 0.058 |  | 9.988 |  | 0.000 |  | 0.469 |  | 0.698 |  |
| SAQ21 |  | t1 |  | -2.162 |  | 0.140 |  | -15.493 |  | 0.000 |  | -2.435 |  | -1.888 |  |
|  |  | t2 |  | -1.284 |  | 0.075 |  | -17.123 |  | 0.000 |  | -1.431 |  | -1.137 |  |
|  |  | t3 |  | -0.528 |  | 0.058 |  | -9.133 |  | 0.000 |  | -0.641 |  | -0.414 |  |
|  |  | t4 |  | 0.844 |  | 0.063 |  | 13.477 |  | 0.000 |  | 0.722 |  | 0.967 |  |
| SAQ24 |  | t1 |  | -1.794 |  | 0.103 |  | -17.447 |  | 0.000 |  | -1.996 |  | -1.593 |  |
|  |  | t2 |  | -1.023 |  | 0.067 |  | -15.324 |  | 0.000 |  | -1.153 |  | -0.892 |  |
|  |  | t3 |  | -0.292 |  | 0.056 |  | -5.240 |  | 1.607×10-7 |  | -0.402 |  | -0.183 |  |
|  |  | t4 |  | 1.064 |  | 0.068 |  | 15.683 |  | 0.000 |  | 0.931 |  | 1.197 |  |
| SAQ26 |  | t1 |  | -1.611 |  | 0.091 |  | -17.794 |  | 0.000 |  | -1.788 |  | -1.433 |  |
|  |  | t2 |  | -0.937 |  | 0.065 |  | -14.499 |  | 0.000 |  | -1.064 |  | -0.811 |  |
|  |  | t3 |  | -0.297 |  | 0.056 |  | -5.327 |  | 9.988×10-8 |  | -0.407 |  | -0.188 |  |
|  |  | t4 |  | 1.056 |  | 0.068 |  | 15.612 |  | 0.000 |  | 0.923 |  | 1.188 |  |
| SAQ13 |  | t1 |  | -1.317 |  | 0.076 |  | -17.272 |  | 0.000 |  | -1.467 |  | -1.168 |  |
|  |  | t2 |  | -0.561 |  | 0.058 |  | -9.647 |  | 0.000 |  | -0.675 |  | -0.447 |  |
|  |  | t3 |  | 0.242 |  | 0.055 |  | 4.369 |  | 1.251×10-5 |  | 0.134 |  | 0.351 |  |
|  |  | t4 |  | 1.252 |  | 0.074 |  | 16.962 |  | 0.000 |  | 1.107 |  | 1.396 |  |
| SAQ10 |  | t1 |  | -0.804 |  | 0.062 |  | -12.993 |  | 0.000 |  | -0.925 |  | -0.683 |  |
|  |  | t2 |  | -0.077 |  | 0.055 |  | -1.399 |  | 0.162 |  | -0.185 |  | 0.031 |  |
|  |  | t3 |  | 0.589 |  | 0.059 |  | 10.073 |  | 0.000 |  | 0.475 |  | 0.704 |  |
|  |  | t4 |  | 1.593 |  | 0.089 |  | 17.802 |  | 0.000 |  | 1.418 |  | 1.769 |  |
| SAQ15 |  | t1 |  | -1.341 |  | 0.077 |  | -17.365 |  | 0.000 |  | -1.492 |  | -1.189 |  |
|  |  | t2 |  | -0.495 |  | 0.057 |  | -8.618 |  | 0.000 |  | -0.607 |  | -0.382 |  |
|  |  | t3 |  | 0.368 |  | 0.056 |  | 6.544 |  | 5.999×10-11 |  | 0.258 |  | 0.479 |  |
|  |  | t4 |  | 1.484 |  | 0.084 |  | 17.738 |  | 0.000 |  | 1.320 |  | 1.647 |  |
| SAQ17 |  | t1 |  | -1.172 |  | 0.071 |  | -16.487 |  | 0.000 |  | -1.311 |  | -1.032 |  |
|  |  | t2 |  | -0.468 |  | 0.057 |  | -8.187 |  | 2.220×10-16 |  | -0.580 |  | -0.356 |  |
|  |  | t3 |  | 0.601 |  | 0.059 |  | 10.243 |  | 0.000 |  | 0.486 |  | 0.716 |  |
|  |  | t4 |  | 1.593 |  | 0.089 |  | 17.802 |  | 0.000 |  | 1.418 |  | 1.769 |  |
| SAQ19 |  | t1 |  | -1.039 |  | 0.067 |  | -15.469 |  | 0.000 |  | -1.171 |  | -0.907 |  |
|  |  | t2 |  | -0.410 |  | 0.057 |  | -7.237 |  | 4.583×10-13 |  | -0.521 |  | -0.299 |  |
|  |  | t3 |  | 0.671 |  | 0.060 |  | 11.256 |  | 0.000 |  | 0.555 |  | 0.788 |  |
|  |  | t4 |  | 1.647 |  | 0.093 |  | 17.765 |  | 0.000 |  | 1.465 |  | 1.828 |  |
| SAQ22 |  | t1 |  | -1.484 |  | 0.084 |  | -17.738 |  | 0.000 |  | -1.647 |  | -1.320 |  |
|  |  | t2 |  | -0.690 |  | 0.060 |  | -11.508 |  | 0.000 |  | -0.807 |  | -0.572 |  |
|  |  | t3 |  | 0.343 |  | 0.056 |  | 6.110 |  | 9.986×10-10 |  | 0.233 |  | 0.453 |  |
|  |  | t4 |  | 1.428 |  | 0.081 |  | 17.633 |  | 0.000 |  | 1.269 |  | 1.587 |  |
|  | | | | | | | | | | | | | | | |

| *Average variance extracted* | | | |
| --- | --- | --- | --- |
| Factor | | AVE | |
| Factor 1 |  | 0.416 |  |
| Factor 2 |  | 0.532 |  |
| Factor 3 |  | 0.367 |  |
| Factor 4 |  | 0.551 |  |
| Factor 5 |  | 0.585 |  |
|  | | | |

Discriminant Validity

# Discriminant Validity

| *Pearson's Correlations* | | | | | | | | | | | | | | | | | |
| --- | --- | --- | --- | --- | --- | --- | --- | --- | --- | --- | --- | --- | --- | --- | --- | --- | --- |
| Variable | |  | | Total GAD | | Total SAQ | | CFA1 | | CFA2 | | CFA3 | | CFA4 | | CFA5 | |
| 1. Total GAD |  | Pearson's r |  | — |  |  |  |  |  |  |  |  |  |  |  |  |  |
|  |  | p-value |  | — |  |  |  |  |  |  |  |  |  |  |  |  |  |
|  |  | Lower 95% CI |  | — |  |  |  |  |  |  |  |  |  |  |  |  |  |
|  |  | Upper 95% CI |  | — |  |  |  |  |  |  |  |  |  |  |  |  |  |
| 2. Total SAQ |  | Pearson's r |  | -0.181 | *** | — |  |  |  |  |  |  |  |  |  |  |  |
|  |  | p-value |  | < .001 |  | — |  |  |  |  |  |  |  |  |  |  |  |
|  |  | Lower 95% CI |  | -0.263 |  | — |  |  |  |  |  |  |  |  |  |  |  |
|  |  | Upper 95% CI |  | -0.097 |  | — |  |  |  |  |  |  |  |  |  |  |  |
| 3. CFA1 |  | Pearson's r |  | -0.148 | *** | 0.627 | *** | — |  |  |  |  |  |  |  |  |  |
|  |  | p-value |  | < .001 |  | < .001 |  | — |  |  |  |  |  |  |  |  |  |
|  |  | Lower 95% CI |  | -0.231 |  | 0.572 |  | — |  |  |  |  |  |  |  |  |  |
|  |  | Upper 95% CI |  | -0.063 |  | 0.676 |  | — |  |  |  |  |  |  |  |  |  |
| 4. CFA2 |  | Pearson's r |  | -0.160 | *** | 0.781 | *** | 0.360 | *** | — |  |  |  |  |  |  |  |
|  |  | p-value |  | < .001 |  | < .001 |  | < .001 |  | — |  |  |  |  |  |  |  |
|  |  | Lower 95% CI |  | -0.242 |  | 0.745 |  | 0.283 |  | — |  |  |  |  |  |  |  |
|  |  | Upper 95% CI |  | -0.075 |  | 0.812 |  | 0.432 |  | — |  |  |  |  |  |  |  |
| 5. CFA3 |  | Pearson's r |  | -0.191 | *** | 0.790 | *** | 0.397 | *** | 0.561 | *** | — |  |  |  |  |  |
|  |  | p-value |  | < .001 |  | < .001 |  | < .001 |  | < .001 |  | — |  |  |  |  |  |
|  |  | Lower 95% CI |  | -0.273 |  | 0.756 |  | 0.323 |  | 0.499 |  | — |  |  |  |  |  |
|  |  | Upper 95% CI |  | -0.107 |  | 0.820 |  | 0.467 |  | 0.617 |  | — |  |  |  |  |  |
| 6. CFA4 |  | Pearson's r |  | -0.016 |  | 0.776 | *** | 0.388 | *** | 0.480 | *** | 0.532 | *** | — |  |  |  |
|  |  | p-value |  | 0.708 |  | < .001 |  | < .001 |  | < .001 |  | < .001 |  | — |  |  |  |
|  |  | Lower 95% CI |  | -0.102 |  | 0.740 |  | 0.312 |  | 0.411 |  | 0.468 |  | — |  |  |  |
|  |  | Upper 95% CI |  | 0.069 |  | 0.808 |  | 0.458 |  | 0.543 |  | 0.591 |  | — |  |  |  |
| 7. CFA5 |  | Pearson's r |  | -0.178 | *** | 0.794 | *** | 0.338 | *** | 0.568 | *** | 0.503 | *** | 0.494 | *** | — |  |
|  |  | p-value |  | < .001 |  | < .001 |  | < .001 |  | < .001 |  | < .001 |  | < .001 |  | — |  |
|  |  | Lower 95% CI |  | -0.259 |  | 0.760 |  | 0.259 |  | 0.507 |  | 0.436 |  | 0.426 |  | — |  |
|  |  | Upper 95% CI |  | -0.093 |  | 0.824 |  | 0.412 |  | 0.623 |  | 0.565 |  | 0.556 |  | — |  |
|  | | | | | | | | | | | | | | | | | |
| * p < .05, ** p < .01, *** p < .001 | | | | | | | | | | | | | | | | | |

### Plots

#### Model plot


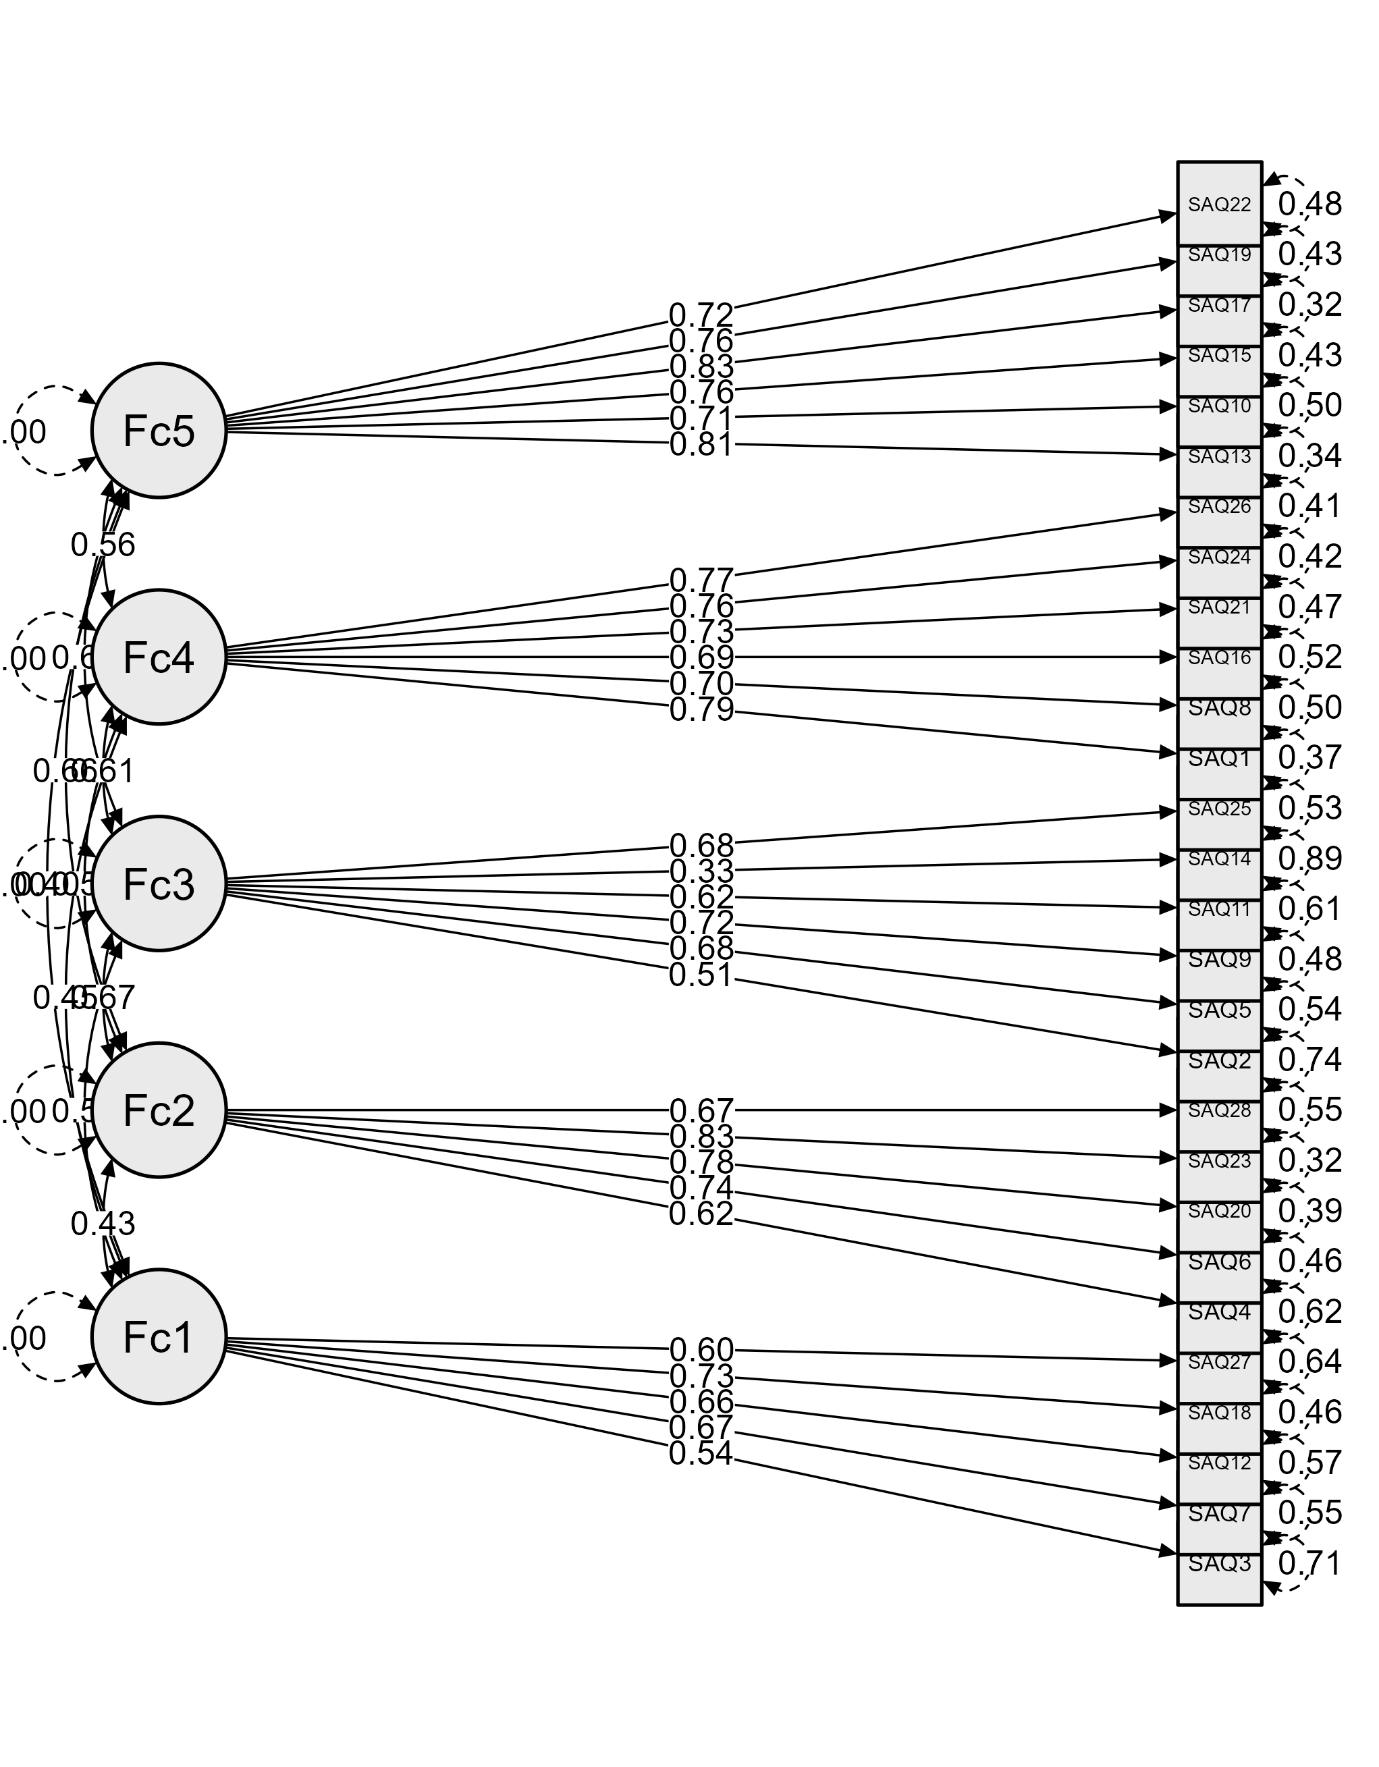


# Convergent Validity

| *Pearson's Correlations* | | | | | | | | | | | | | |
| --- | --- | --- | --- | --- | --- | --- | --- | --- | --- | --- | --- | --- | --- |
|  | |  | |  | | Pearson's r | | p | | Lower 95% CI | | Upper 95% CI | |
| LSAS Fear Total |  | - |  | LSAS Avoidance Total |  | 0.781 | *** | < .001 |  | 0.745 |  | 0.812 |  |
| LSAS Fear Total |  | - |  | CFA1 |  | 0.372 | *** | < .001 |  | 0.296 |  | 0.444 |  |
| LSAS Fear Total |  | - |  | CFA2 |  | 0.491 | *** | < .001 |  | 0.423 |  | 0.554 |  |
| LSAS Fear Total |  | - |  | CFA3 |  | 0.519 | *** | < .001 |  | 0.453 |  | 0.579 |  |
| LSAS Fear Total |  | - |  | CFA4 |  | 0.405 | *** | < .001 |  | 0.331 |  | 0.474 |  |
| LSAS Fear Total |  | - |  | CFA5 |  | 0.528 | *** | < .001 |  | 0.463 |  | 0.587 |  |
| LSAS Fear Total |  | - |  | Total SAQ |  | 0.615 | *** | < .001 |  | 0.559 |  | 0.666 |  |
| LSAS Fear Total |  | - |  | LSAS Total |  | 0.878 | *** | < .001 |  | 0.857 |  | 0.896 |  |
| LSAS Avoidance Total |  | - |  | CFA1 |  | 0.275 | *** | < .001 |  | 0.194 |  | 0.352 |  |
| LSAS Avoidance Total |  | - |  | CFA2 |  | 0.309 | *** | < .001 |  | 0.229 |  | 0.385 |  |
| LSAS Avoidance Total |  | - |  | CFA3 |  | 0.386 | *** | < .001 |  | 0.310 |  | 0.456 |  |
| LSAS Avoidance Total |  | - |  | CFA4 |  | 0.459 | *** | < .001 |  | 0.389 |  | 0.524 |  |
| LSAS Avoidance Total |  | - |  | CFA5 |  | 0.333 | *** | < .001 |  | 0.254 |  | 0.407 |  |
| LSAS Avoidance Total |  | - |  | Total SAQ |  | 0.469 | *** | < .001 |  | 0.399 |  | 0.533 |  |
| LSAS Avoidance Total |  | - |  | LSAS Total |  | 0.890 | *** | < .001 |  | 0.871 |  | 0.907 |  |
| CFA1 |  | - |  | CFA2 |  | 0.360 | *** | < .001 |  | 0.283 |  | 0.432 |  |
| CFA1 |  | - |  | CFA3 |  | 0.397 | *** | < .001 |  | 0.323 |  | 0.467 |  |
| CFA1 |  | - |  | CFA4 |  | 0.388 | *** | < .001 |  | 0.312 |  | 0.458 |  |
| CFA1 |  | - |  | CFA5 |  | 0.338 | *** | < .001 |  | 0.259 |  | 0.412 |  |
| CFA1 |  | - |  | Total SAQ |  | 0.627 | *** | < .001 |  | 0.572 |  | 0.676 |  |
| CFA1 |  | - |  | LSAS Total |  | 0.364 | *** | < .001 |  | 0.288 |  | 0.437 |  |
| CFA2 |  | - |  | CFA3 |  | 0.561 | *** | < .001 |  | 0.499 |  | 0.617 |  |
| CFA2 |  | - |  | CFA4 |  | 0.480 | *** | < .001 |  | 0.411 |  | 0.543 |  |
| CFA2 |  | - |  | CFA5 |  | 0.568 | *** | < .001 |  | 0.507 |  | 0.623 |  |
| CFA2 |  | - |  | Total SAQ |  | 0.781 | *** | < .001 |  | 0.745 |  | 0.812 |  |
| CFA2 |  | - |  | LSAS Total |  | 0.450 | *** | < .001 |  | 0.378 |  | 0.516 |  |
| CFA3 |  | - |  | CFA4 |  | 0.532 | *** | < .001 |  | 0.468 |  | 0.591 |  |
| CFA3 |  | - |  | CFA5 |  | 0.503 | *** | < .001 |  | 0.436 |  | 0.565 |  |
| CFA3 |  | - |  | Total SAQ |  | 0.790 | *** | < .001 |  | 0.756 |  | 0.820 |  |
| CFA3 |  | - |  | LSAS Total |  | 0.510 | *** | < .001 |  | 0.443 |  | 0.570 |  |
| CFA4 |  | - |  | CFA5 |  | 0.878 | *** | < .001 |  | 0.857 |  | 0.896 |  |
| CFA4 |  | - |  | Total SAQ |  | 0.776 | *** | < .001 |  | 0.740 |  | 0.808 |  |
| CFA4 |  | - |  | LSAS Total |  | 0.489 | *** | < .001 |  | 0.421 |  | 0.552 |  |
| CFA5 |  | - |  | Total SAQ |  | 0.794 | *** | < .001 |  | 0.760 |  | 0.824 |  |
| CFA5 |  | - |  | LSAS Total |  | 0.484 | *** | < .001 |  | 0.416 |  | 0.547 |  |
| Total SAQ |  | - |  | LSAS Total |  | 0.611 | *** | < .001 |  | 0.554 |  | 0.662 |  |
|  | | | | | | | | | | | | | |
| * p < .05, ** p < .01, *** p < .001 | | | | | | | | | | | | | |

# Internal Reliability: Entire Scale

| *Frequentist Scale Reliability Statistics* | | | | | | | | | |
| --- | --- | --- | --- | --- | --- | --- | --- | --- | --- |
|  | | | | | | 95% CI | | | |
| Coefficient | | Estimate | | Std. Error | | Lower | | Upper | |
| Coefficient ω |  | 0.917 |  | 0.005 |  | 0.907 |  | 0.927 |  |
| Coefficient α |  | 0.916 |  | 0.007 |  | 0.902 |  | 0.930 |  |
|  | | | | | | | | | |

| *Frequentist Individual Item Reliability Statistics* | | | | | | | | | | | | | |
| --- | --- | --- | --- | --- | --- | --- | --- | --- | --- | --- | --- | --- | --- |
|  | | Coefficient ω (if item dropped) | | | | | | Coefficient α (if item dropped) | | | | | |
| Item | | Estimate | | Lower 95% CI | | Upper 95% CI | | Estimate | | Lower 95% CI | | Upper 95% CI | |
| SAQ1 |  | 0.913 |  | 0.902 |  | 0.924 |  | 0.912 |  | 0.897 |  | 0.927 |  |
| SAQ10 |  | 0.914 |  | 0.904 |  | 0.925 |  | 0.913 |  | 0.898 |  | 0.928 |  |
| SAQ11 |  | 0.915 |  | 0.904 |  | 0.925 |  | 0.914 |  | 0.899 |  | 0.928 |  |
| SAQ12 |  | 0.916 |  | 0.905 |  | 0.926 |  | 0.915 |  | 0.900 |  | 0.929 |  |
| SAQ13 |  | 0.912 |  | 0.901 |  | 0.923 |  | 0.911 |  | 0.896 |  | 0.926 |  |
| SAQ14 |  | 0.919 |  | 0.909 |  | 0.929 |  | 0.918 |  | 0.905 |  | 0.932 |  |
| SAQ15 |  | 0.913 |  | 0.903 |  | 0.924 |  | 0.912 |  | 0.897 |  | 0.927 |  |
| SAQ16 |  | 0.915 |  | 0.904 |  | 0.925 |  | 0.914 |  | 0.899 |  | 0.928 |  |
| SAQ17 |  | 0.913 |  | 0.902 |  | 0.923 |  | 0.912 |  | 0.896 |  | 0.927 |  |
| SAQ18 |  | 0.916 |  | 0.905 |  | 0.926 |  | 0.914 |  | 0.900 |  | 0.929 |  |
| SAQ19 |  | 0.913 |  | 0.903 |  | 0.924 |  | 0.912 |  | 0.897 |  | 0.927 |  |
| SAQ2 |  | 0.916 |  | 0.906 |  | 0.927 |  | 0.915 |  | 0.901 |  | 0.930 |  |
| SAQ20 |  | 0.913 |  | 0.903 |  | 0.924 |  | 0.912 |  | 0.897 |  | 0.927 |  |
| SAQ21 |  | 0.914 |  | 0.903 |  | 0.925 |  | 0.913 |  | 0.898 |  | 0.928 |  |
| SAQ22 |  | 0.914 |  | 0.903 |  | 0.925 |  | 0.913 |  | 0.898 |  | 0.928 |  |
| SAQ23 |  | 0.912 |  | 0.901 |  | 0.923 |  | 0.911 |  | 0.896 |  | 0.927 |  |
| SAQ24 |  | 0.913 |  | 0.903 |  | 0.924 |  | 0.913 |  | 0.898 |  | 0.927 |  |
| SAQ25 |  | 0.914 |  | 0.903 |  | 0.925 |  | 0.913 |  | 0.898 |  | 0.928 |  |
| SAQ26 |  | 0.913 |  | 0.903 |  | 0.924 |  | 0.913 |  | 0.898 |  | 0.927 |  |
| SAQ27 |  | 0.916 |  | 0.906 |  | 0.926 |  | 0.915 |  | 0.901 |  | 0.929 |  |
| SAQ28 |  | 0.915 |  | 0.904 |  | 0.925 |  | 0.914 |  | 0.899 |  | 0.928 |  |
| SAQ3 |  | 0.916 |  | 0.906 |  | 0.927 |  | 0.915 |  | 0.901 |  | 0.929 |  |
| SAQ4 |  | 0.915 |  | 0.904 |  | 0.925 |  | 0.914 |  | 0.899 |  | 0.928 |  |
| SAQ5 |  | 0.914 |  | 0.903 |  | 0.925 |  | 0.913 |  | 0.898 |  | 0.928 |  |
| SAQ6 |  | 0.913 |  | 0.902 |  | 0.923 |  | 0.912 |  | 0.897 |  | 0.927 |  |
| SAQ7 |  | 0.916 |  | 0.905 |  | 0.926 |  | 0.914 |  | 0.900 |  | 0.929 |  |
| SAQ8 |  | 0.914 |  | 0.903 |  | 0.925 |  | 0.913 |  | 0.898 |  | 0.928 |  |
| SAQ9 |  | 0.913 |  | 0.903 |  | 0.924 |  | 0.913 |  | 0.898 |  | 0.927 |  |
|  | | | | | | | | | | | | | |

## Internal Reliability: Factor 1

| *Frequentist Scale Reliability Statistics* | | | | | | | | | |
| --- | --- | --- | --- | --- | --- | --- | --- | --- | --- |
|  | | | | | | 95% CI | | | |
| Coefficient | | Estimate | | Std. Error | | Lower | | Upper | |
| Coefficient ω |  | 0.794 |  | 0.014 |  | 0.766 |  | 0.822 |  |
| Coefficient α |  | 0.787 |  | 0.021 |  | 0.745 |  | 0.828 |  |
|  | | | | | | | | | |

| *Frequentist Individual Item Reliability Statistics* | | | | | | | |
| --- | --- | --- | --- | --- | --- | --- | --- |
|  | | Coefficient α (if item dropped) | | | | | |
| Item | | Estimate | | Lower 95% CI | | Upper 95% CI | |
| SAQ12 |  | 0.746 |  | 0.695 |  | 0.796 |  |
| SAQ18 |  | 0.711 |  | 0.652 |  | 0.770 |  |
| SAQ27 |  | 0.744 |  | 0.696 |  | 0.792 |  |
| SAQ3 |  | 0.776 |  | 0.735 |  | 0.816 |  |
| SAQ7 |  | 0.750 |  | 0.700 |  | 0.800 |  |
|  | | | | | | | |

## Internal Reliability: Factor 2

| *Frequentist Scale Reliability Statistics* | | | | | | | | | |
| --- | --- | --- | --- | --- | --- | --- | --- | --- | --- |
|  | | | | | | 95% CI | | | |
| Coefficient | | Estimate | | Std. Error | | Lower | | Upper | |
| Coefficient ω |  | 0.816 |  | 0.013 |  | 0.792 |  | 0.841 |  |
| Coefficient α |  | 0.813 |  | 0.016 |  | 0.782 |  | 0.844 |  |
|  | | | | | | | | | |

| *Frequentist Individual Item Reliability Statistics* | | | | | | | |
| --- | --- | --- | --- | --- | --- | --- | --- |
|  | | Coefficient α (if item dropped) | | | | | |
| Item | | Estimate | | Lower 95% CI | | Upper 95% CI | |
| SAQ20 |  | 0.752 |  | 0.711 |  | 0.794 |  |
| SAQ23 |  | 0.765 |  | 0.725 |  | 0.806 |  |
| SAQ28 |  | 0.775 |  | 0.737 |  | 0.812 |  |
| SAQ4 |  | 0.797 |  | 0.763 |  | 0.832 |  |
| SAQ6 |  | 0.791 |  | 0.753 |  | 0.828 |  |
|  | | | | | | | |

## Internal Reliability: Factor 3

| *Frequentist Scale Reliability Statistics* | | | | | | | | | |
| --- | --- | --- | --- | --- | --- | --- | --- | --- | --- |
|  | | | | | | 95% CI | | | |
| Coefficient | | Estimate | | Std. Error | | Lower | | Upper | |
| Coefficient ω |  | 0.716 |  | 0.019 |  | 0.679 |  | 0.753 |  |
| Coefficient α |  | 0.706 |  | 0.025 |  | 0.656 |  | 0.755 |  |
|  | | | | | | | | | |

| *Frequentist Individual Item Reliability Statistics* | | | | | | | |
| --- | --- | --- | --- | --- | --- | --- | --- |
|  | | Coefficient α (if item dropped) | | | | | |
| Item | | Estimate | | Lower 95% CI | | Upper 95% CI | |
| SAQ11 |  | 0.639 |  | 0.578 |  | 0.700 |  |
| SAQ14 |  | 0.742 |  | 0.701 |  | 0.784 |  |
| SAQ2 |  | 0.683 |  | 0.631 |  | 0.735 |  |
| SAQ25 |  | 0.634 |  | 0.572 |  | 0.696 |  |
| SAQ5 |  | 0.670 |  | 0.615 |  | 0.726 |  |
| SAQ9 |  | 0.616 |  | 0.548 |  | 0.684 |  |
|  | | | | | | | |

## Internal Reliability: Factor 4

| *Frequentist Scale Reliability Statistics* | | | | | | | | | |
| --- | --- | --- | --- | --- | --- | --- | --- | --- | --- |
|  | | | | | | 95% CI | | | |
| Coefficient | | Estimate | | Std. Error | | Lower | | Upper | |
| Coefficient ω |  | 0.853 |  | 0.010 |  | 0.833 |  | 0.872 |  |
| Coefficient α |  | 0.850 |  | 0.012 |  | 0.828 |  | 0.873 |  |
|  | | | | | | | | | |

| *Frequentist Individual Item Reliability Statistics* | | | | | | | |
| --- | --- | --- | --- | --- | --- | --- | --- |
|  | | Coefficient α (if item dropped) | | | | | |
| Item | | Estimate | | Lower 95% CI | | Upper 95% CI | |
| SAQ1 |  | 0.835 |  | 0.810 |  | 0.861 |  |
| SAQ16 |  | 0.823 |  | 0.796 |  | 0.851 |  |
| SAQ21 |  | 0.826 |  | 0.799 |  | 0.854 |  |
| SAQ24 |  | 0.818 |  | 0.790 |  | 0.846 |  |
| SAQ26 |  | 0.809 |  | 0.778 |  | 0.839 |  |
| SAQ8 |  | 0.841 |  | 0.816 |  | 0.865 |  |
|  | | | | | | | |

## Internal Reliability: Factor 5

| *Frequentist Scale Reliability Statistics* | | | | | | | | | |
| --- | --- | --- | --- | --- | --- | --- | --- | --- | --- |
|  | | | | | | 95% CI | | | |
| Coefficient | | Estimate | | Std. Error | | Lower | | Upper | |
| Coefficient ω |  | 0.868 |  | 0.009 |  | 0.850 |  | 0.885 |  |
| Coefficient α |  | 0.868 |  | 0.011 |  | 0.846 |  | 0.890 |  |
|  | | | | | | | | | |

| *Frequentist Individual Item Reliability Statistics* | | | | | | | |
| --- | --- | --- | --- | --- | --- | --- | --- |
|  | | Coefficient α (if item dropped) | | | | | |
| Item | | Estimate | | Lower 95% CI | | Upper 95% CI | |
| SAQ10 |  | 0.856 |  | 0.832 |  | 0.881 |  |
| SAQ13 |  | 0.848 |  | 0.823 |  | 0.874 |  |
| SAQ15 |  | 0.844 |  | 0.818 |  | 0.870 |  |
| SAQ17 |  | 0.833 |  | 0.806 |  | 0.861 |  |
| SAQ19 |  | 0.845 |  | 0.820 |  | 0.871 |  |
| SAQ22 |  | 0.847 |  | 0.821 |  | 0.873 |  |
|  | | | | | | | |

# Test-Retest Reliability: Intraclass Correlation

| *Intraclass Correlation* | | | | | | | |
| --- | --- | --- | --- | --- | --- | --- | --- |
| Type | | Point Estimate | | Lower 95% CI | | Upper 95% CI | |
| ICC2,1 |  | 0.994 |  | 0.991 |  | 0.996 |  |
|  | | | | | | | |
| *Note.*  117 subjects and 2 raters/measurements. ICC type as referenced by Shrout & Fleiss (1979). | | | | | | | |

# ANOVA: Age Difference

| *ANOVA - Total SAQ* | | | | | | | | | | | | | | | |
| --- | --- | --- | --- | --- | --- | --- | --- | --- | --- | --- | --- | --- | --- | --- | --- |
| Cases | | Sum of Squares | | df | | Mean Square | | F | | p | | η² | | ω² | |
| Age Cohort |  | 135.098 |  | 2 |  | 67.549 |  | 0.253 |  | 0.777 |  | 9.729×10-4 |  | 0.000 |  |
| Residuals |  | 138722.520 |  | 519 |  | 267.288 |  |  |  |  |  |  |  |  |  |
|  | | | | | | | | | | | | | | | |
| *Note.*  Type III Sum of Squares | | | | | | | | | | | | | | | |

**Descriptives**

| *Descriptives - Total SAQ* | | | | | | | | | | | |
| --- | --- | --- | --- | --- | --- | --- | --- | --- | --- | --- | --- |
| Age Cohort | | N | | Mean | | SD | | SE | | Coefficient of variation | |
| Early Adult |  | 299 |  | 90.468 |  | 16.075 |  | 0.930 |  | 0.178 |  |
| Middle Adult |  | 186 |  | 89.801 |  | 16.275 |  | 1.193 |  | 0.181 |  |
| Late Adult |  | 37 |  | 88.649 |  | 18.796 |  | 3.090 |  | 0.212 |  |
|  | | | | | | | | | | | |

**Assumption Checks**

| *Test for Equality of Variances (Levene's)* | | | | | | | |
| --- | --- | --- | --- | --- | --- | --- | --- |
| F | | df1 | | df2 | | p | |
| 0.734 |  | 2.000 |  | 519.000 |  | 0.481 |  |
|  | | | | | | | |

# ANOVA: Gender Difference

| *ANOVA - Total SAQ* | | | | | | | | | | | | | | | |
| --- | --- | --- | --- | --- | --- | --- | --- | --- | --- | --- | --- | --- | --- | --- | --- |
| Cases | | Sum of Squares | | df | | Mean Square | | F | | p | | η² | | ω² | |
| Gender |  | 14.248 |  | 1 |  | 14.248 |  | 0.053 |  | 0.817 |  | 1.026×10-4 |  | 0.000 |  |
| Residuals |  | 138843.371 |  | 520 |  | 267.006 |  |  |  |  |  |  |  |  |  |
|  | | | | | | | | | | | | | | | |
| *Note.*  Type III Sum of Squares | | | | | | | | | | | | | | | |

**Descriptives**

| *Descriptives - Total SAQ* | | | | | | | | | | | |
| --- | --- | --- | --- | --- | --- | --- | --- | --- | --- | --- | --- |
| Gender | | N | | Mean | | SD | | SE | | Coefficient of variation | |
| Male |  | 255 |  | 90.271 |  | 16.081 |  | 1.007 |  | 0.178 |  |
| Female |  | 267 |  | 89.940 |  | 16.585 |  | 1.015 |  | 0.184 |  |
|  | | | | | | | | | | | |

**Assumption Checks**

| *Test for Equality of Variances (Levene's)* | | | | | | | |
| --- | --- | --- | --- | --- | --- | --- | --- |
| F | | df1 | | df2 | | p | |
| 0.603 |  | 1.000 |  | 520.000 |  | 0.438 |  |
|  | | | | | | | |

# ANOVA: Educational Level Difference

| *ANOVA - Total SAQ* | | | | | | | | | | | | | | | |
| --- | --- | --- | --- | --- | --- | --- | --- | --- | --- | --- | --- | --- | --- | --- | --- |
| Cases | | Sum of Squares | | df | | Mean Square | | F | | p | | η² | | ω² | |
| Education |  | 47.602 |  | 2 |  | 23.801 |  | 0.089 |  | 0.915 |  | 3.428×10-4 |  | 0.000 |  |
| Residuals |  | 138810.017 |  | 519 |  | 267.457 |  |  |  |  |  |  |  |  |  |
|  | | | | | | | | | | | | | | | |
| *Note.*  Type III Sum of Squares | | | | | | | | | | | | | | | |

**Descriptives**

| *Descriptives - Total SAQ* | | | | | | | | | | | |
| --- | --- | --- | --- | --- | --- | --- | --- | --- | --- | --- | --- |
| Education | | N | | Mean | | SD | | SE | | Coefficient of variation | |
| Postgraduate |  | 68 |  | 90.662 |  | 16.599 |  | 2.013 |  | 0.183 |  |
| Graduate |  | 366 |  | 89.907 |  | 16.019 |  | 0.837 |  | 0.178 |  |
| Nongraduate |  | 88 |  | 90.477 |  | 17.513 |  | 1.867 |  | 0.194 |  |
|  | | | | | | | | | | | |

**Assumption Checks**

| *Test for Equality of Variances (Levene's)* | | | | | | | |
| --- | --- | --- | --- | --- | --- | --- | --- |
| F | | df1 | | df2 | | p | |
| 1.922 |  | 2.000 |  | 519.000 |  | 0.147 |  |
|  | | | | | | | |

# ANOVA: Occupation Difference

| *ANOVA - Total SAQ* | | | | | | | | | | | | | | | |
| --- | --- | --- | --- | --- | --- | --- | --- | --- | --- | --- | --- | --- | --- | --- | --- |
| Cases | | Sum of Squares | | df | | Mean Square | | F | | p | | η² | | ω² | |
| Occupation |  | 571.413 |  | 3 |  | 190.471 |  | 0.713 |  | 0.544 |  | 0.004 |  | 0.000 |  |
| Residuals |  | 138286.205 |  | 518 |  | 266.962 |  |  |  |  |  |  |  |  |  |
|  | | | | | | | | | | | | | | | |
| *Note.*  Type III Sum of Squares | | | | | | | | | | | | | | | |

**Descriptives**

| *Descriptives - Total SAQ* | | | | | | | | | | | |
| --- | --- | --- | --- | --- | --- | --- | --- | --- | --- | --- | --- |
| Occupation | | N | | Mean | | SD | | SE | | Coefficient of variation | |
| Student |  | 76 |  | 91.263 |  | 15.714 |  | 1.803 |  | 0.172 |  |
| Employed |  | 336 |  | 90.363 |  | 16.055 |  | 0.876 |  | 0.178 |  |
| Unemployed |  | 77 |  | 87.701 |  | 17.365 |  | 1.979 |  | 0.198 |  |
| Retired |  | 33 |  | 90.364 |  | 18.112 |  | 3.153 |  | 0.200 |  |
|  | | | | | | | | | | | |

**Assumption Checks**

| *Test for Equality of Variances (Levene's)* | | | | | | | |
| --- | --- | --- | --- | --- | --- | --- | --- |
| F | | df1 | | df2 | | p | |
| 0.498 |  | 3.000 |  | 518.000 |  | 0.684 |  |
|  | | | | | | | |
