# Supplementary material for: Psychometric properties of the Indonesian version of social anxiety questionnaire for adults (SAQ-A30)
Source: Research Square preprint supplement (doi:10.21203/rs.3.rs-5564217/v1), 2025-05-06
Supplement: Supplementary file 10 [file cb640416f38bbc37edc0dec7.docx]

Psychometric properties of the Indonesian version of social anxiety questionnaire for adults (SAQ-A30)

Gilda Thiefanee, Kustimah Kustimah, Nurul Wardhani

Supplementary Information:

Table 1 Cognitive Interview Participants

| **No.** | **Initials** | **Age** | **Gender** | **Education** | **Response Time** | **Mental Health History** |
| --- | --- | --- | --- | --- | --- | --- |
| 1 | AF | 28 | Female | Master’s | 4’ | - |
| 2 | YA | 25 | Female | Bachelor | 4’41” | - |
| 3 | TD | 54 | Male | Bachelor | 10’42” | - |
| 4 | GC | 61 | Female | Diploma | 23’34” | Social anxiety |
| 5 | MN | 20 | Female | Junior High | 9’14” | - |

Table 2 Cognitive Interview Summary

| **Aspect** | **Summary** |
| --- | --- |
| Understanding (Item)  Sample item 7: *Ikut serta dalam pertemuan dengan orang yang berwenang (guru, atasan, dosen, dan lain-lain)* / Participating in a meeting with people in authority (teacher, employer, lecturer, etc) | Subjects found the statement easy to understand, and especially noted the added examples. It aided them in grasping the context of the situation since the formal phrase “*orang yang berwenang*” (people in authority) has legal connotations in Indonesia so it’s more often used to describe police or government officials, yet it has no appropriate alternative. |
| Retrieval (Item)  Sample item 6: *Merasa diamati oleh seseorang yang saya sukai* / Feeling watched by people I find attractive | When asked about the topic of interactions with the opposite sex or someone you’re attracted to, all participants unanimously and quickly responded with feeling shy or flustered, no matter their age or experience. This response aligns with the intention of the item and shows that all participants possess the necessary knowledge to answer it. |
| Judgment (Item)  Sample item 21: *Berbuat salah di depan orang lain* / Making a mistake in front of other people | Most participants reported no discomfort nor trouble answering the question, with the exception of the participant with a diagnosis of social anxiety who admitted to feeling briefly apprehensive when answering because she was remembering a related past event. |
| Response (Item)  Sample item 17: *Berbicara dengan orang yang tidak saya kenal di sebuah pesta atau pertemuan* / Talking to people I don’t know at a party or a meeting | All participants found the response options to be clear and complete (not at all to extremely high). |
| Adequacy of Content (Construct) | When asked if there was any questions regarding social anxiety or changes that they deem necessary to add, all participants stated that the questions are thorough and they had no more feedback for improvement. |
