# Supplementary material for: Psychometric properties of the Indonesian version of social anxiety questionnaire for adults (SAQ-A30)
Source: Research Square preprint supplement (doi:10.21203/rs.3.rs-5564217/v1), 2025-05-06
Supplement: Supplementary file 11 [file eedb469eaa491c15fb4622c1.docx]

Psychometric properties of the Indonesian version of social anxiety questionnaire for adults (SAQ-A30)

Gilda Thiefanee, Kustimah Kustimah, Nurul Wardhani

Supplementary Information:

Correlations (Pearson) between SAQ-A30, LSAS-SR, and GAD-7

| SAQ-A30 | LSAS Fear | LSAS Avoidance | Total LSAS | GAD-7 |
| --- | --- | --- | --- | --- |
| Fc1: speaking in public / talking with people in authority | 0.372* | 0.275* | 0.364* | -0.148* |
| Fc2: interactions with the opposite sex | 0.491* | 0.309* | 0.450* | -0.160* |
| Fc3: assertive expression of annoyance, disgust, or displeasure | 0.519* | 0.386* | 0.510* | -0.191* |
| Fc4: criticism and embarrassment | 0.405* | 0.459* | 0.489* | -0.016* |
| Fc5: interactions with strangers | 0.528* | 0.333* | 0.484* | -0.178* |
| Total | 0.615* | 0.469* | 0.611* | -0.181* |

**p* < 0.001
