# Supplementary material for: Psychometric properties of the Indonesian version of social anxiety questionnaire for adults (SAQ-A30)
Source: Research Square preprint supplement (doi:10.21203/rs.3.rs-5564217/v1), 2025-05-06
Supplement: Supplementary file 12 [file fbbb7dcf54dd9d91cebca772.docx]

Psychometric properties of the Indonesian version of social anxiety questionnaire for adults (SAQ-A30)

Gilda Thiefanee, Kustimah Kustimah, Nurul Wardhani

Supplementary Information:

ANOVA Results for Age, Gender, Education, and Occupation

| **Cases** | **Sum of Squares** | **df** | **Mean Square** | **F** | **p** | **η2** | **ω2** |
| --- | --- | --- | --- | --- | --- | --- | --- |
| Age | 135.098 | 2 | 67.549 | 0.253 | 0.777 | 0.0009729 | 0.000 |
| Residuals | 138722.520 | 519 | 267.288 |  |  |  |  |
| Gender | 14.248 | 1 | 14.248 | 0.053 | 0.817 | 0.0001026 | 0.000 |
| Residuals | 138843.371 | 520 | 267.006 |  |  |  |  |
| Education | 47.602 | 2 | 23.801 | 0.089 | 0.915 | 0.0003428 | 0.000 |
| Residuals | 138810.017 | 519 | 267.457 |  |  |  |  |
| Occupation | 571.413 | 3 | 190.471 | 0.713 | 0.544 | 0.004 | 0.000 |
| Residuals | 138286.205 | 518 | 266.962 |  |  |  |  |
